# Supplementary material for: A multiplex lectin-channel monitoring method for human serum glycoproteins by quantitative mass spectrometry
Source: Royal Society of Chemistry journal article supplement (doi:10.1039/c1an15775b), 2011-12-08

## Supplementary Information

### A multiplex lectin-channel monitoring method for human serum glycoproteins by quantitative mass spectrometry

Yeong Hee Ahn, Eun Sun Ji, Park Min Shin, Kwang Hoe Kim, Yong-Sam Kim, Jeong Heon Ko, and Jong Shin Yoo

**Supplementary Information 1.** Venn diagrams for the number of peptides identified by 1D LC-MS/MS analysis for each tryptic digest of AAL-, L-PHA-, Con A-, and DSA-captured fractions of a cancer serum.

**Supplementary Information 1.** Venn diagrams for the number of peptides identified by 1D LC–MS/MS analysis for each tryptic digest of AAL-, L-PHA-, Con A-, and DSA-captured fractions of a cancer serum.

The number of peptides identified from each run for each lectin-fractionated subproteome fraction was compared. About half the peptides identified for triplicate runs were identified at least twice in all sample fractions analyzed, regardless of the lectin used for fractionation (57% in the AAL-captured fraction, 53% in L-PHA-captured, 65% in Con A-captured, and 62% in DSA-captured). From the similar ratios among lectins, it was interpreted that all lectin-fractionated samples could be analyzed under analogous analytical conditions.

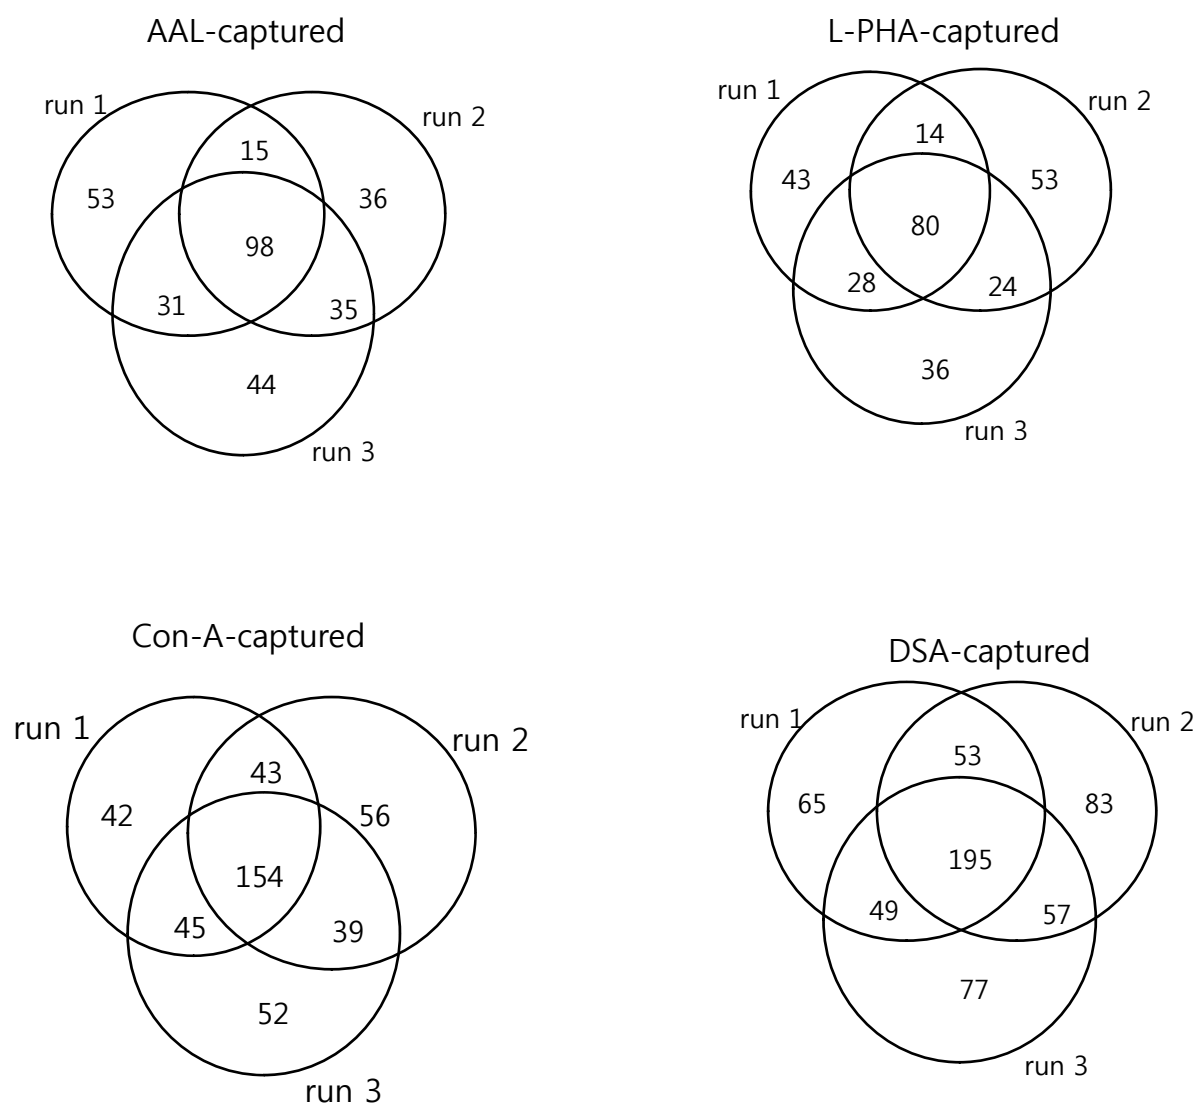

Supplement: c1an15775b.pdf [file c1an15775b.pdf]
